# Supplementary material for: Low-Frequency Hearing Preservation With Long Electrode Arrays: Inclusion of Unaided Hearing Threshold Assessment in the Postoperative Test Battery
Source: PubMed Central journal article supplement (PMC7229778; doi:10.1044/2019_aja-19-00045), 2019-12-13
Supplement: AJA-29-1-s001.pdf [file AJA-29-1-s001.pdf]

**Supplemental Material S1.** Unaided hearing thresholds at 125, 250, and 500 Hz measured at the pre-operative (labeled “PreOp”), initial activation (labeled “Act”), and 12-month intervals. Participants P10 and P11 are not plotted in Figure 1, as they did not demonstrate audible thresholds ( $\leq 80$  dB HL) in the post-operative period; however, their unaided hearing detection thresholds improved in the post-operative period. The remaining 14 participants had no response at all test intervals.

| Participant | 125 Hz |           |            | 250 Hz |     |            | 500 Hz |     |       |
|-------------|--------|-----------|------------|--------|-----|------------|--------|-----|-------|
|             | PreOp  | Act       | 12-mo      | PreOp  | Act | 12-mo      | PreOp  | Act | 12-mo |
| <b>P1</b>   | 65     | <b>70</b> | <b>75</b>  | 75     | NR  | 100*       | 85     | NR  | 105*  |
| <b>P2</b>   | 65     | <b>80</b> | NR         | 65     | 100 | NR         | 65     | 110 | NR    |
| <b>P3</b>   | 65     | <b>80</b> | <b>75*</b> | 70     | 95  | 90*        | 70     | 100 | 100   |
| <b>P4</b>   | 65     | <b>80</b> | <b>70*</b> | 70     | 100 | 90*        | 75     | 105 | 95*   |
| <b>P5</b>   | 20     | <b>50</b> | 85         | 20     | 85  | 105        | 70     | 90  | 100   |
| <b>P6</b>   | 60     | 90        | <b>60*</b> | 75     | NR  | 85*        | 80     | NR  | 100*  |
| <b>P7</b>   | 80     | 85        | <b>70*</b> | 85     | 90  | <b>75*</b> | 90     | 90  | 85*   |
| <b>P8</b>   | 60     | 85        | <b>55*</b> | 85     | 100 | <b>80*</b> | 110    | NR  | NR    |
| <b>P9</b>   | 65     | 95        | --         | 70     | 105 | --         | 70     | 110 | --    |
| <b>P10</b>  | 30     | NR        | 90*        | 60     | NR  | 105*       | 85     | NR  | NR    |
| <b>P11</b>  | 80     | NR        | 90*        | 80     | NR  | NR         | 80     | NR  | 105*  |

NR: No response at the maximum intensity output of the audiometer for each frequency.

-- : Withdrew from the study prior to interval.

\* : Threshold improvement in the post-activation period.

Thresholds meeting the 80-dB-HL criterion are in bold.
